# Supplementary material
Source: PubMed Central journal article supplement (PMC3500474)
Supplement: supp_JOP.2012.000597_000597_Data_Supplement_2.pdf [file supp_JOP.2012.000597_000597_Data_Supplement_2.pdf]

Appendix 2: Summary of results

|                                                                                 |                                                                                                                                                                                                                                                                                                                                                                       |
|---------------------------------------------------------------------------------|-----------------------------------------------------------------------------------------------------------------------------------------------------------------------------------------------------------------------------------------------------------------------------------------------------------------------------------------------------------------------|
| Respondents' demographics                                                       | 69% < 50 years of age<br>61% male<br>76% practiced in an university setting<br>42% treated solid malignancies<br>38% treated hematologic malignancies                                                                                                                                                                                                                 |
| Respondents' beliefs in HBV screening prior to chemotherapy                     | 53% agreed that screening is important<br>28% were uncertain<br>19% disagreed that screening is important                                                                                                                                                                                                                                                             |
| Respondents' estimation of HBV prevalence in Canada                             | 51% correctly identified the prevalence of HBV as 1 to 5%<br>18% underestimated the prevalence of HBV<br>27% over-estimated the prevalence of HBV<br>4% did not respond                                                                                                                                                                                               |
| Respondents' estimation of HBV reactivation risk                                | 22% correctly identified the reactivation risk of HBV in hematologic malignancies<br>23% correctly identified the reactivation risk of HBV in solid malignancies                                                                                                                                                                                                      |
| Respondents' HBV screening practices prior to administering chemotherapy        | 22% tested or intended to test all patients<br>36% tested or intended to test only those patients with risk factors for HBV carriage<br>40% rarely or never tested their patients                                                                                                                                                                                     |
| Respondents' previous experience of HBV reactivation                            | 43% had previous experience with HBV reactivation in their clinical practice                                                                                                                                                                                                                                                                                          |
| Respondents' knowledge of existing guidelines and risk factors for HBV carriage | 23% were aware of existing guidelines or institutional policies regarding HBV screening prior to chemotherapy<br>30% were able to list the major risk factor for HBV carriage – country of origin<br>2% of were able to correctly identify all the continents with HBV endemic regions                                                                                |
| Respondents' HBV carriers prior to administering chemotherapy                   | 43% would seek guidance from an expert (hepatologist or infectious disease specialist)<br>24% would start the patient on an anti-HBV nucleoside/nucleotide analogue (eg. lamivudine) and proceed with chemotherapy<br>2% would give an anti-HBV nucleoside/nucleotide analogue and delay chemotherapy<br>8% would monitor liver enzymes and proceed with chemotherapy |

HBV, hepatitis B virus
